# Supplementary material for: Splicing QTL of human adipose-related traits
Source: PubMed Central journal article supplement (PMC5762880; doi:10.1038/s41598-017-18767-z), 2018-01-10
Supplement: 41598_2017_18767_MOESM1_ESM.pdf [file 41598_2017_18767_MOESM1_ESM.pdf]

# Supplementary file

## Splicing QTL of human adipose-related traits

Liang Ma<sup>1</sup>, Peilin Jia<sup>1</sup>, Zhongming Zhao<sup>1,2,\*</sup>

<sup>1</sup>Center for Precision Health, School of Biomedical Informatics, The University of Texas Health Science Center at Houston, Houston, TX, USA

<sup>2</sup>Human Genetics Center, School of Public Health, The University of Texas Health Science Center at Houston, Houston, TX, USA

Supplementary Table S1. HaploReg information of 11 top SNPs of adipose GWAS (PMID: 27918534)

| Chr.  | SNP ID     | Pos. (bp, hg38) | Pos. (bp, hg19) | Ref. allele | Alt. allele | Minor allele frequency |      |      |      | RefSeq gene                |
|-------|------------|-----------------|-----------------|-------------|-------------|------------------------|------|------|------|----------------------------|
|       |            |                 |                 |             |             | AFR                    | AMR  | ASN  | EUR  |                            |
| chr1  | rs6587515  | 150636412       | 150608888       | G           | A           | 0                      | 0.04 | 0.18 | 0.08 | 6.8kb 5' of <i>ENSA</i>    |
| chr1  | rs6689335  | 219455340       | 219628682       | T           | C           | 0.03                   | 0.32 | 0.30 | 0.49 | 242kb 3' of <i>LYPLAL1</i> |
| chr2  | rs10198628 | 12824371        | 12964497        | A           | G           | 0.6                    | 0.51 | 0.84 | 0.55 | 82kb 3' of <i>TRIB2</i>    |
| chr3  | rs7374732  | 23161963        | 23203454        | C           | T           | 0.93                   | 0.72 | 0.65 | 0.65 | 41kb 5' of <i>UBE2E2</i>   |
| chr5  | rs10060123 | 126348218       | 125683910       | C           | A           | 0.12                   | 0.20 | 0.20 | 0.26 | 12kb 5' of <i>GRAMD3</i>   |
| chr5  | rs1650505  | 158602726       | 158029734       | G           | A           | 0.22                   | 0.28 | 0.24 | 0.20 | 93kb 3' of <i>EBF1</i>     |
| chr6  | rs912056   | 6735964         | 6736197         | A           | T           | 0.82                   | 0.56 | 0.25 | 0.64 | 81kb 3' of <i>LY86</i>     |
| chr6  | rs2842895  | 7106083         | 7106316         | G           | C           | 0.04                   | 0.46 | 0    | 0.56 | 1.5kb 5' of <i>RREB1</i>   |
| chr6  | rs2237199  | 16429790        | 16430021        | G           | A           | 0.18                   | 0.17 | 0.37 | 0.12 | <i>ATXN1</i>               |
| chr16 | rs7185735  | 53788739        | 53822651        | A           | G           | 0.54                   | 0.28 | 0.16 | 0.42 | <i>FTO</i>                 |
| chr17 | rs2123685  | 39897636        | 38053889        | T           | C           | 0.01                   | 0.03 | 0    | 0.04 | 7kb 3' of <i>GSDMB</i>     |

AFR: African. AMR: Ad Mixed American. ASN: Asians. EUR: European.

Supplementary Table S2. Splicing QTL for adipose traits

| SNP ID     | Position (bp) | GWAS_pval | Splicing feature                |        |                     |                     |                     |           |          |           |              | Distance (bp) |
|------------|---------------|-----------|---------------------------------|--------|---------------------|---------------------|---------------------|-----------|----------|-----------|--------------|---------------|
|            |               |           | Trait-Tissue                    | Gene   | Exon x1             | Exon x2             | Junction Coordinate | Direction | Junction | sQTL_pval | RefGene ID   |               |
| rs17817288 | 53807764      | 9.50E-09  | SAT_OVERALL-AdiposeSubcutaneous | FTO    | Exon 5/9            | Exon 8/9            | 53907777-53967942   | fwd       | Novel    | 6.92E-04  | NM_001080432 | 100,013       |
| rs17817288 | 53807764      | 9.50E-09  | SAT_OVERALL-ArteryTibial        | AKTIP  | Truncated Exon 5/10 | Exon 10/10          | 53526431-53529017   | fwd       | Novel    | 5.52E-05  | NM_001012398 | 281,333       |
| rs7206790  | 53797908      | 4.20E-09  | SAT_OVERALL-Thyroid             | AKTIP  | Exon 9/10           | Truncated Exon 6/10 | 53526665-53528483   | rev       | Novel    | 7.31E-04  | NM_001012398 | 271,243       |
| rs7206790  | 53797908      | 4.20E-09  | SAT_OVERALL-Thyroid             | AKTIP  | Exon 9/10           | Exon 6/10           | 53526665-53528429   | rev       | Novel    | 5.73E-05  | NM_001012398 | 271,243       |
| rs11710420 | 23221931      | 3.20E-08  | VATSAT_OVERALL-WholeBlood       | UBE2E1 | Exon 3/6            | Exon 4/6            | 23853001-23929058   | rev       | Known    | 9.19E-04  | NM_003341    | 631,070       |
| rs11710420 | 23221931      | 3.20E-08  | VATSAT_OVERALL-WholeBlood       | UBE2E1 | Exon 2/6            | Exon 4/6            | 23848912-23929058   | rev       | Known    | 4.09E-04  | NM_003341    | 626,981       |
| rs2237199  | 16430271      | 1.40E-08  | SATHU_MEN-ArteryTibial          | DTNBP1 | Exon4/10            | Exon6/10            | 15615630-15637975   | fwd       | Novel    | 8.30E-04  | NM_001271667 | 814,641       |

SAT, subcutaneous adipose tissue volume; VATSAT, ratio of visceral-to-subcutaneous adipose tissue volume; SATHU, Subcutaneous adipose tissue attenuation.

Distance: base pair from SNP to junction.

Supplementary Table S3. Four splicing QTL GWAS p-values for body fat distribution traits

| Trait                | Adipose GWAS p-value |           |            |           |
|----------------------|----------------------|-----------|------------|-----------|
|                      | rs17817288           | rs7206790 | rs11710420 | rs2237199 |
| PAT_MEN              | 7.80E-04             | 0.007     | 0.001      | 0.072     |
| PAT_OVERALL          | 0.001                | 0.011     | 0.160      | 0.590     |
| PAT_WOMEN            | 0.480                | 0.530     | 0.120      | 0.640     |
| PATadjHtWt_MEN       | 0.046                | 0.160     | 9.60E-04   | 0.053     |
| PATadjHtWt_OVERALL   | 0.130                | 0.150     | 0.036      | 0.920     |
| PATadjHtWt_WOMEN     | 0.610                | 0.870     | 0.540      | 0.420     |
| SAT_MEN              | 2.50E-06             | 1.40E-06  | 0.370      | 1.80E-04  |
| SAT_OVERALL          | 9.50E-09             | 4.20E-09  | 0.650      | 0.008     |
| SAT_WOMEN            | 5.20E-04             | 3.40E-04  | 0.780      | 0.820     |
| SATHU_MEN            | 0.079                | 0.006     | 0.500      | 1.40E-08  |
| SATHU_OVERALL        | 0.016                | 4.00E-04  | 0.069      | 0.002     |
| SATHU_WOMEN          | 0.094                | 0.018     | 0.062      | 0.360     |
| VAT_MEN              | 8.10E-05             | 0.002     | 0.400      | 0.001     |
| VAT_OVERALL          | 7.60E-05             | 0.001     | 0.001      | 0.004     |
| VAT_WOMEN            | 0.069                | 0.130     | 9.70E-05   | 0.480     |
| VATadjBMI_MEN        | 0.680                | 0.820     | 0.110      | 0.036     |
| VATadjBMI_OVERALL    | 0.990                | 0.740     | 6.10E-04   | 0.012     |
| VATadjBMI_WOMEN      | 0.540                | 0.690     | 0.003      | 0.110     |
| VATHU_MEN            | 0.210                | 0.100     | 0.840      | 8.00E-06  |
| VATHU_OVERALL        | 0.036                | 0.007     | 0.170      | 0.009     |
| VATHU_WOMEN          | 0.086                | 0.026     | 0.067      | 0.680     |
| VATSAT_MEN           | 0.300                | 0.150     | 0.014      | 0.930     |
| VATSAT_OVERALL       | 0.140                | 0.019     | 3.20E-08   | 0.370     |
| VATSAT_WOMEN         | 0.310                | 0.055     | 2.60E-07   | 0.320     |
| VATSATadjBMI_MEN     | 0.390                | 0.200     | 0.022      | 0.770     |
| VATSATadjBMI_OVERALL | 0.120                | 0.010     | 3.10E-07   | 0.290     |
| VATSATadjBMI_WOMEN   | 0.210                | 0.027     | 2.60E-06   | 0.340     |

Supplementary Table S4. GWAS p-values of the four splicing QTLs for the adipose-related traits

| PMID     | Trait                   | GWAS p-value |           |            |           | Sample size                               | Ancestry                                                           |
|----------|-------------------------|--------------|-----------|------------|-----------|-------------------------------------------|--------------------------------------------------------------------|
|          |                         | rs17817288   | rs7206790 | rs11710420 | rs2237199 |                                           |                                                                    |
| 27918534 | Adipose                 | 9.50E-09     | 4.20E-09  | 3.20E-08   | 1.40E-08  | 18,332 (9,594 women/8,738 men)            | European, African, Hispanic, and Chinese                           |
| 27398621 | Type 2 diabetes         | 2.88E-10     | 9.22E-12  | 0.7031     | NA        | 12,940 (11,645 T2D cases/32,769 controls) | European, African, Hispanic, and Asian                             |
| 26343387 | Coronary artery disease | 0.0232       | 0.0667    | 0.4568     | 0.4289    | 184,305 (60,801 cases/123,504 controls)   | European, African Americans, Hispanic, South Asian, and East Asian |
| 24097068 | HDL                     | 0.3028       | 3.92E-06  | 2.80E-05   | 0.9663    | 188,577 Europeans/7,898 non-Europeans     | European, African, East Asian, and South Asian                     |
|          | LDL                     | 0.7714       | 0.9233    | 0.4601     | 0.6172    |                                           |                                                                    |
|          | Total cholesterol       | 0.7378       | 0.4435    | 0.2637     | 0.6275    |                                           |                                                                    |
|          | Triglycerides           | 0.3297       | 7.98E-05  | 4.05E-04   | 0.9626    |                                           |                                                                    |

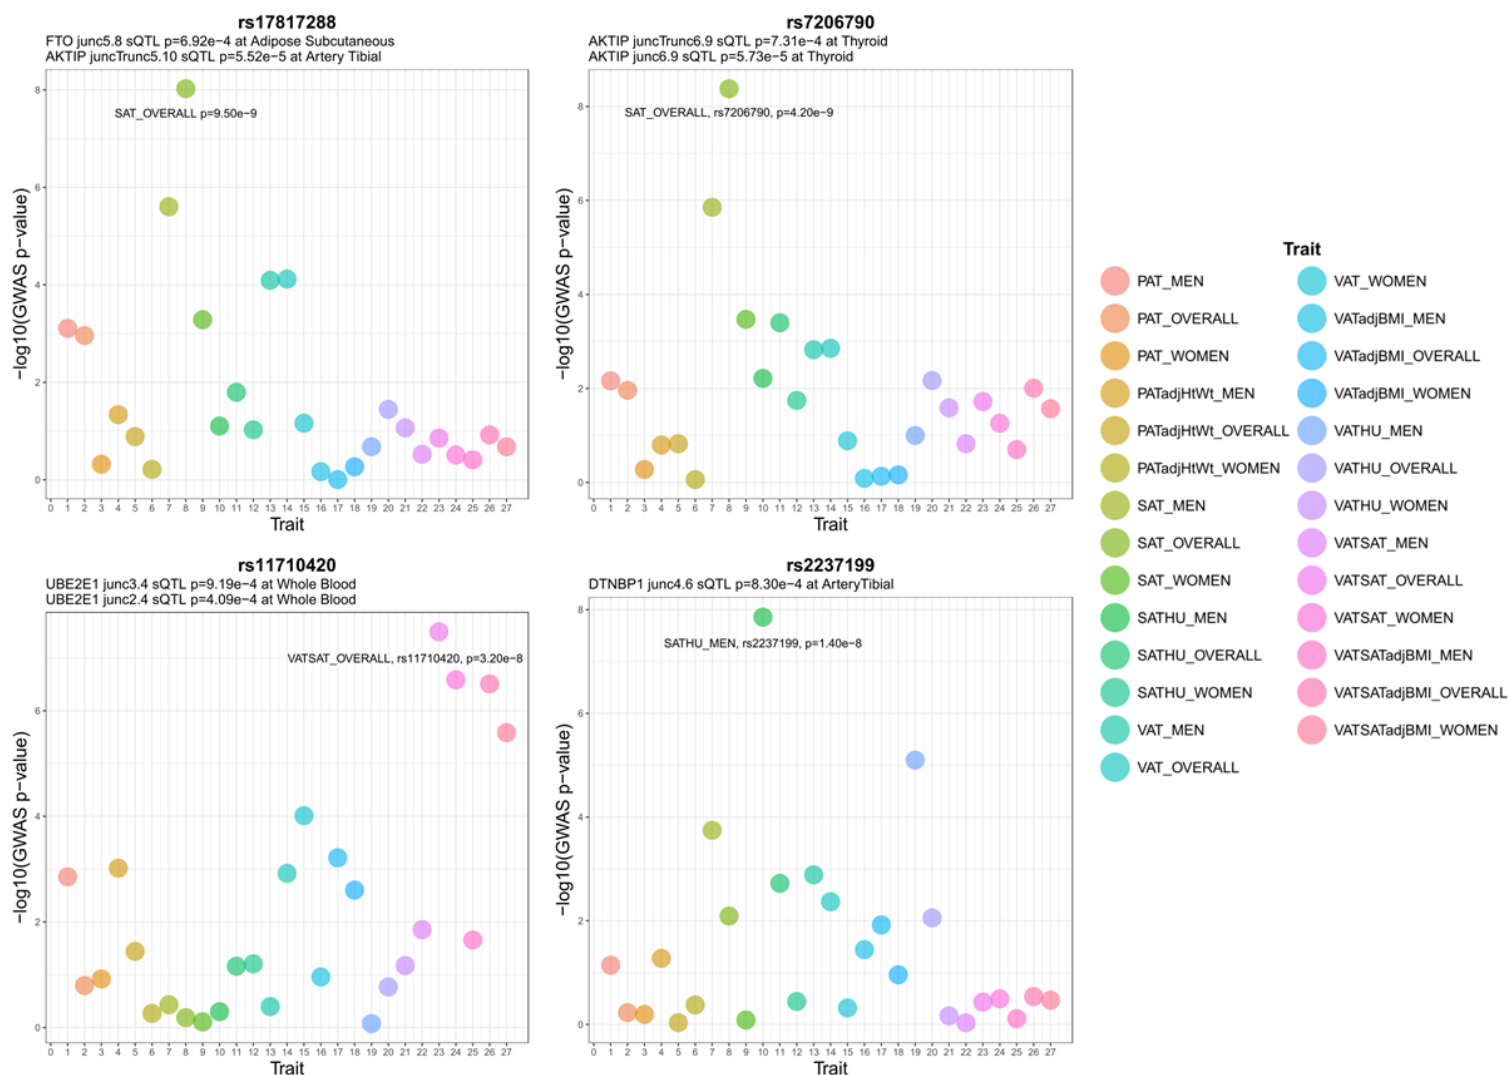

Supplementary Figure S1. The p-value distributions of 4 splicing junction SNPs in 27 GWAS including 9 traits in 3 groups (male, female and overall). Note: each dot represents a combo of trait and group. SAT, subcutaneous adipose tissue volume; VAT, visceral adipose tissue volume; VATadjBMI, visceral adipose tissue volume adjusted for BMI; PAT, pericardial adipose tissue volume; PATadjHtWt, pericardial adipose tissue volume adjusted for height and weight; SATHU, subcutaneous adipose tissue attenuation; VATHU, visceral adipose tissue attenuation; VATSAT, ratio of visceral-to-subcutaneous adipose tissue volume; and VATSATadjBMI, ratio of visceral-to-subcutaneous adipose tissue volume adjusted for BMI.
